# Supplementary material for: Genome-wide sequencing of small RNAs reveals a tissue-specific loss of conserved microRNA families in Echinococcus granulosus
Source: PubMed Central journal article supplement (PMC4156656; doi:10.1186/1471-2164-15-736), 2014-08-29

Adult Cyst PSC

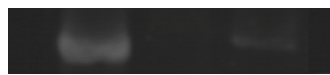

**egr-miR-31**

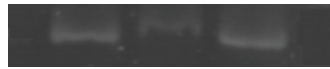

**egr-miR-61**

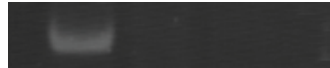

**egr-miR-36**

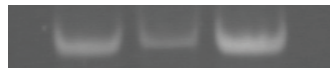

**egr-miR-281**

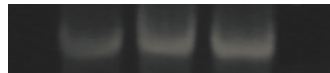

**egr-bantam**

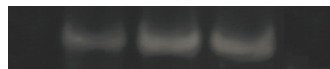

**egr-miR-1992**

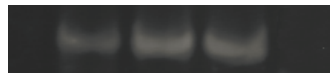

**egr-miR-133**

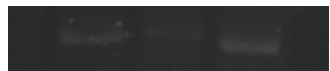

**egr-miR-133\***

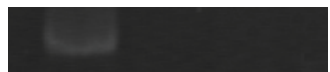

**egr-new-7**

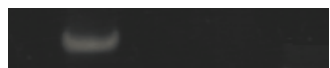

**egr-new-10**

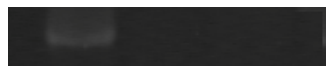

**egr-new-12**

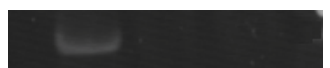

**egr-new-15**

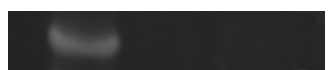

**egr-new-22**

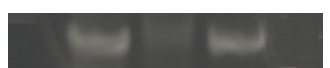

**egr-new-22\***

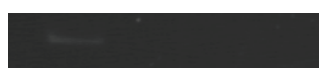

**egr-new-24**

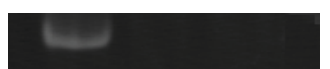

**egr-new-61**

miR-3479 miR-3479\* new-17\* new-17 new-28 new-29 marker

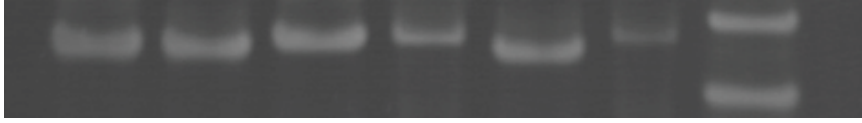

new-51 new-65 new-87\* new-87 new-125 marker

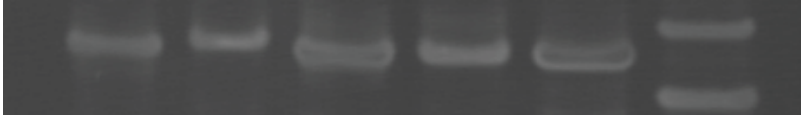

Supplement: 12864_2014_6407_MOESM3_ESM.pdf [file 12864_2014_6407_MOESM3_ESM.pdf]
