# Supplementary material for: Genome-wide sequencing of small RNAs reveals a tissue-specific loss of conserved microRNA families in Echinococcus granulosus
Source: PubMed Central journal article supplement (PMC4156656; doi:10.1186/1471-2164-15-736), 2014-08-29
Supplement: 12864_2014_6407_MOESM2_ESM.pdf [file 12864_2014_6407_MOESM2_ESM.pdf]

## egr-bantam

hairpin:

CGGCCUUUCUCGCGUUCUGAGAGCGUAAUUCUUUAGUUAACUACCGCCUUCUGAGAUCGCGAUUACAGCUGAU

mature:

UGAGAUCGCGAUUACAGCUGAU

ENERGY = -23.5

|             |               |      |             |
|-------------|---------------|------|-------------|
| total reads | <b>mature</b> | loop | <b>star</b> |
| 375292      | 374999        | 15   | 278         |

Bases 1 to 75

```
      10      20      30
--   UUUC   U  G  --   ----|  UC
    CGGCU   UCGCG UCU AGA GCG   UAAU  U
    GUCGA   AGCGC AGA UCU CGC   AAUUG  U
UA   CAUU   U  G  UC  CAUCA^  AU
    70      60      50      40
```

\*\*\*\*\* \* \*\*\*\*

|                   |                        |
|-------------------|------------------------|
| sj-bantam         | UGAGAUCGCGAUUAAAGCUGGU |
| sma-bantam        | UGAGAUCGCGAUUAAAGCUGGU |
| <b>egr-bantam</b> | UGAGAUCGCGAUUACAGCUGAU |
| sme-bantam-b-3p   | UGAGAUCACUGCGAAAGCUGAU |
| sme-bantam-a      | UGAGAUCACUAUGAAAGCUGG- |
| sme-bantam-c-3p   | UGAGAUCAUUUGAAAGCUUUU  |

---

## egr-miR-61

hairpin:

CGUGAGGCCUUUCUUGUGCAUGGAUAAUGAGGGGUCUUUAAAGCCUCGACCAUGACUAGAAAGAGCACUCACAUCC

mature:

UGACUAGAAAGAGCACUCACAUCC

ENERGY = -30.5

|             |               |      |             |
|-------------|---------------|------|-------------|
| total reads | <b>mature</b> | loop | <b>star</b> |
| 273328      | 272555        | 1    | 772         |

Bases 1 to 76

```
      10      20      30
C--- -| C   U  G   AUAUGA   CU
    GUGAG GC CUUUCU GU CAUGG   GGGGU  U
    CACUC CG GAAAGA CA GUACC   CUCCG  U
CCUA  A^ A   U  -   AG-----  AA
    70      60      50      40
```

```

***** * **
egr-miR-61      UGACUAGAAAAGACACACAUC
sja-miR-61      UGACUAGAAAAGUCACACACU--
sma-miR-61      UGACUAGAAAAGUCACACACU--
cte-miR-2720-3p UGACUAGAGAGUUUACUCAUC--
sme-miR-61a-3p  UGACUAGAAAAGUUCACUUACUGU-
sme-miR-61b-3p  UGACUAGAAUGUUCACCUUCUU-

```

## egr-miR-31

```

hairpin:
UGGCAAGAUACUGGCGAAGCUGAGGGGUCAAGUAAUCGUCAGCUUCGUCUGGUCUUGCUGC
mature:
UGGCAAGAUACUGGCGAAGCUGA

```

ENERGY = -32.4

|             |               |      |             |
|-------------|---------------|------|-------------|
| total reads | <b>mature</b> | loop | <b>star</b> |
| 126020      | 124603        | 48   | 1369        |

Bases 1 to 61

```

      10      20      30
U-|   ACU           G  GUCA
  GGCAAGAU  GGCGAAGCUGA  GG  \
  UCGUUCUG  CUCUUCGACU  CU  A
CG~   GU-           G  AAUG
60     50           40

```

```

***** *** * **
cte-miR-31      AGGCAAGAUUGGCAUAGCU--
lgi-miR-31      AGGCAAGAUUGGCAUAGCU--
sme-miR-31a-5p  AGGCAAGAUUGGCAUAAACUGA
sme-miR-31b-5p  AGGCAAGAUUGGCAUAGCUGA
sma-miR-31-5p   UGGCAAGAUUUGGCGAAGCUGA
sja-miR-31-5p   UGGCAAGAUUACGGCGAAGCUGA
egr-miR-31      UGGCAAGAUACUGGCGAAGCUGA

```

## egr-miR-2162

```

hairpin:
AGUGGAUUUGUUGCAUAAUACAUCGUGGGGUUUGUAAUUGCAACUUUUCACUCC
mature:
UAAUUGCAACUUUUCACUCC

```

ENERGY = -20

|             |               |      |             |
|-------------|---------------|------|-------------|
| total reads | <b>mature</b> | loop | <b>star</b> |
| 36158       | 31005         | 0    | 5153        |

Bases 1 to 57

```

      10      20
--|   UUU      U  C  G
   AGUGGA  GUUGCAUA  UAU  AUC  U
   UCACUU  CAACGUAU  AUGU  UGG  G
CC^   UU-      U  U  G
      50      40      30

```

```

*****      *****
cte-miR-1993   UAUUAUGCUGAUUUCACGAGA
lgi-miR-1993   UAUUAUGCUGAUUUCACGAGA
sme-miR-2162-3p UAUUAUGCAAAUUCACAAU-
egr-miR-2162  UAUUAUGCAACUUUCACUCC-
sja-miR-2162-3p UAUUAUGCAACGUUUCACUCU-

```

### egr-miR-3479

hairpin:  
CGGUGAAAAGUUUAUGCAUUUACAUCGGUUGAUGUAUUGCACGUUCUUUCGCCAUC  
mature:  
UAUUGCACGUUCUUUCGCCAUC

ENERGY = -23.3

|             |               |      |             |
|-------------|---------------|------|-------------|
| total reads | <b>mature</b> | loop | <b>star</b> |
| 19325       | 16950         | 11   | 2364        |

Bases 1 to 55

```

      10      20
C--|   UUUU      UU  G
   GGUGAAAAG  UGCA  UACAUC  G
   CCGCUUUC   ACGU  AUGUAG  U
CUA^   UUGC   U-      U
      50      40      30

```

```

*****      * ***** *
sja-miR-3479-3p UAUUGCACUUACCUUCGCCUUG
sma-miR-3479-3p UAUUGCACUAACCUUCGCCUUG
egr-miR-3479   UAUUGCACGUUCUUUCGCCAUC

```

## egr-miR-281

hairpin:

AAGGAGGGCCUUUUGACCCUUGAGAAAUAUUCAAUGUCAUGGAGUUGCUCUCUAUA

mature:

UGUCAUGGAGUUGCUCUCUAUA

ENERGY = -22.5

|             |               |      |             |
|-------------|---------------|------|-------------|
| total reads | <b>mature</b> | loop | <b>star</b> |
| 11111       | 11061         | 0    | 50          |

Bases 1 to 59

10 20

AA- C-| CC GAA

GGAGGC CUUUAUGAC UUGA A

UCUCUCG GAGGUACUG AACU U

AUA UU^ U- AAA

50 40 30

\*\*\*\*\* \*\*\*\*\*

|                    |                        |
|--------------------|------------------------|
| cte-miR-281        | UGUCAUGGAGUUGCUCUCUUA  |
| lgi-miR-281-3p     | UGUCAUGGAGUUGCUCUCUUA  |
| <b>egr-miR-281</b> | UGUCAUGGAGUUGCUCUCUAUA |
| sme-miR-281-3p     | UGUCAUGGAUAUGCUCUUC--- |

---

## egr-miR-36

hairpin:

ACGGAUUGUCCGCGUAAACCGGAUAAGGUGAAGGCCUUUUUAACUGCUGGUCACCGGGUAGACAUUCCUUGC

mature:

UCACCGGGUAGACAUUCCUUGC

ENERGY = -31.6

|             |               |      |             |
|-------------|---------------|------|-------------|
| total reads | <b>mature</b> | loop | <b>star</b> |
| 2901        | 2896          | 2    | 3           |

Bases 1 to 75

10 20 30

AC-- U CG A - AU----| G

GGA UGUC UCCGGU ACC GCG AAGGU A

CCU ACAG GGGCCA UGG CGU UUCCG A

CGUU U AU C U CAAUUU^ G

70 60 50 40

```

***** *
egr-miR-36      UCACCGGGUAGACAUCCUUGC-
sme-miR-36c-3p UCACCGGGUAGACAUUCAUU---
sja-miR-36-3p  CCACCGGGUAGACAUUCAUUCGC
sma-miR-36-3p  CCACCGGGUAGACAUUCAUUCGC
sme-miR-36a-3p UCACCGGGUAGACAUUCAUA--
sme-miR-36b-3p UCACCGGGUAGACAUUAUCAUG
cte-miR-36     UCACCGGGUUAACAUAUCAUCG-

```

---

### egr-miR-133

```

hairpin:
GGCUGAUUUGUGGGGCUCAGAAAAGCUGUAAAUGAAAACUUUUGGUCCCCAUUAACCAGCCGC
mature:
UUGGUCCCCAUUAACCAGCCGC

```

ENERGY = -22.9

|             |               |      |             |
|-------------|---------------|------|-------------|
| total reads | <b>mature</b> | loop | <b>star</b> |
| 1749        | 1044          | 19   | 686         |

Bases 1 to 63

```

      10      20      30
--|  A  U      CU  AAGCUGUA
   GGCUG UU GUGGGG CAGAA  \
   CCGAC AA UACCCC GUUUU  A
CG^  C  U      UG  CAAAAGUA
   60      50      40

```

```

***** * *****
cte-miR-133     UUGGUCCCCUUAACCAGCUGU
lgi-miR-133-3p UUGGUCCCCUUAACCAGCUGU
sme-miR-133a-3p UUGGUCCCCGUAACCAGCUGU
sja-miR-133     UUGGUCCCUUAUAACCAGCUGU
sme-miR-133b-3p UUGGUCCCCAUUAACCAGCA--
egr-miR-133     UUGGUCCCCAUUAACCAGCCGC

```

---

### egr-miR-1992

```

hairpin:
UUUCAUUGGUCAAUUGCUAAUAUUUCUUGCGUAAAUUUACAAAUAUCAGCAGUUGUACCAUUGAAAUG
mature:
UCAGCAGUUGUACCAUUGAAAUG

```

ENERGY = -21.3

total reads                    **mature**                    loop                    **star**  
 1519                            1218                    1                        300

Bases    1                    to                    68

```

      10            20            30
--   U  -|        A        CUUGC  A
    UUUCA UGGU CAAUUGCU AUUUU    GUA A
    AAAGU ACCA GUUGACGA UAUAAA    CAU U
GU   U  U^       C        ----- U
      60            50            40
  
```

\*\*\*\*\* \*\* \*\*

```

cte-miR-1992            UCAGCAGUUGUACCACUGAUGUG-
cla-miR-1992            UCAGCAGUUGUACCACUGAUGUGU
lgi-miR-1992            UCAGCAGUUGUACCACUGAUUUG-
egr-miR-1992            UCAGCAGUUGUACCAUUGAAAUG-
sme-miR-1992-3p        UCAGCAGUUGUCCAUGAC----
  
```

### egr-miR-307

hairpin:  
 AUCCCGUGGGUUGAGCGAUGCCUUUGUGUUCUGCACCUCUAUGCGCAUCACAACCUACUUGAUUGAGG  
 mature:  
 UCACAACCUACUUGAUUGAGG

ENERGY = -20.4

total reads                    **mature**                    loop                    **star**  
 40982                        40877                    10                        95

Bases    1                    to                    69

```

      10            20            30
----- CC        AGC        CUUU----| UU
      AUC GUGGGUUG    GAUGC        GUG \
      UAG CAUCCAAC    CUACG        CAC C
GGAGU UU        A--        CGUAUCUC^ GU
      60            50            40
  
```

\*\*\*\*\* \* \*\* \*\*

```

egr-miR-307            UCACAACCUACUUGAUUGAGG--
sja-miR-307            UCACAACCUACUUGAUUGAG---
cte-miR-67             UCACAACCUUGCAUGAAUGAGGU-
lgi-miR-67             UCACAACCUUGCAUGAAUGAGGAC
sme-miR-67-3p         UCACAACCUCCAUGAACGAGGGU
  
```

## egr-new-7

hairpin:

UGGCGCUUUCUAACUUACUGAUAGUGAUUUUUCAGUAAAAGUCAUUAAUAGCACCUCA

mature:

UGGCGCUUUCUAACUUACUGA

ENERGY = -19.7

| total reads | mature | loop | star |
|-------------|--------|------|------|
| 37789       | 37786  | 0    | 3    |

Bases 1 to 57

10 20  
U-- C -| CUA U  
GG GC UUU ACUUUACUGA UAG G  
CC CG AAA UGAAAUGACUAUU A  
ACU A U^ UAC U  
50 40 30

NA

---

## egr-new-10

hairpin:

UGAGUAUUGUACCAUGCGGUGAGUGACCUUGUCUCCUCCACCUACUCAUUGCAGGGUAGAAUACUCC

mature:

UGAGUAUUGUACCAUGCGGUGA

ENERGY = -28.9

| total reads | mature | loop | star |
|-------------|--------|------|------|
| 17014       | 16815  | 4    | 195  |

Bases 1 to 68

10 20 30  
U| G A ACCUUGUC  
GAGUAUU UACC UGCGGUGAGUG U  
CUCAUAA AUGG ACGUUACUCAU C  
C^ G G CCACCUUC  
60 50 40

NA

---

## egr-new-12

hairpin:  
UGGCGCUUGAUUUCAACACUGUUAGAAGCAACAGUGUUGAUACCAGGCAUUCACC  
mature:  
UGGCGCUUGAUUUCAACACUGU

ENERGY = -22.3

| total reads | mature | loop | star |
|-------------|--------|------|------|
| 4850        | 4845   | 0    | 5    |

Bases 1 to 55

|          | 10    | 20          |    |
|----------|-------|-------------|----|
| UGGC---  | AUU   |             | AG |
|          | GCUUG | UCAACACUGU  | A  |
|          | CGGAC | AGUUGUGACAA | A  |
| CCACUUA^ | CAU   |             | CG |
|          | 50    | 40          | 30 |

NA

---

## egr-new-15

hairpin:  
UGGAGCUUGGUGACAAGACUGACAGACAAGUGGCAGUGUUGCUAUCAAUGCUCGCA  
mature:  
UGGAGCUUGGUGACAAGACUGAC

ENERGY = -23.3

| total reads | mature | loop | star |
|-------------|--------|------|------|
| 2445        | 2444   | 0    | 1    |

Bases 1 to 57

|     | 10     | 20               |      |
|-----|--------|------------------|------|
| U-- | -  A G | A GA             |      |
|     | GGAGC  | UUGGUG CAA ACUG  | CA C |
|     | CCUCG  | AACUUAU GUU UGAC | GU A |
| ACG | U^     | C G              | G GA |
|     | 50     | 40               | 30   |

NA

---



## egr-new-17

hairpin:  
GGGCUCGUUUACUCGAAUUGGUCUGCGUGGGGCACUAAUUCGAGUCAACAGGGUCGUU  
mature:  
GGGCUCGUUUACUCGAAUUGGU

ENERGY = -25.1

| total reads | mature | loop | star |
|-------------|--------|------|------|
| 1814        | 1045   | 0    | 769  |

Bases 1 to 58

```
      10      20
G--  -|  U      CU  GU
      GGCUC GUU ACUCGAAUUGGU GC \
      CUGGG CAA UGAGCUAAUCA CG G
UUG   A^  C      --  GG
      50      40      30
```

NA

---

## egr-new-22

hairpin:  
UGGCGCUUGAUUUCAACGCUGAUAGAAAAACCCGUACAUCAGUGUUGAUGUCAGGUUGCUUCU  
mature:  
AGUGUUGAUGUCAGGUUGCUUCU

ENERGY = -24.9

| total reads | mature | loop | star |
|-------------|--------|------|------|
| 1180        | 1079   | 5    | 96   |

Bases 1 to 63

```
      10      20      30
U--  -|  U      AGAAAA
      GGC GCUUGAU UCAACGCUGAU C
      UCG UGGACUG AGUUGUGACUA A
UCU  U^  U      CAUGCC
      60      50      40
```

NA

---

## egr-new-24

hairpin:

UGGCGCUUGACCAUGCUACUGAUAGACGCAAUCAGUUGUAUCAUCAAAUGCGCCGCA

mature:

UGGCGCUUGACCAUGCUACUGA

ENERGY = -23.7

| total reads | mature | loop | star |
|-------------|--------|------|------|
| 534         | 533    | 0    | 1    |

Bases 1 to 57

|     | 10    | 20   |               |
|-----|-------|------|---------------|
| U-- | -     | CC   | U AGA         |
|     | GGCGC | UUGA | AUGC ACUGAU C |
|     | CCGCG | AACU | UAUG UGACUA G |
| ACG | U^    | AC   | U AAC         |
|     | 50    | 40   | 30            |

NA

---

## egr-new-25

hairpin:

UAUAUCAAACGUCAGGUUUUGGUGGAAAAGAAAACAUGGCGUUUUGGUAAGA

mature:

AACAUGGCGUUUUGGUAAGA

ENERGY = -20.5

| total reads | mature | loop | star |
|-------------|--------|------|------|
| 518         | 335    | 0    | 183  |

Bases 1 to 53

|      | 10            | 20    |         |
|------|---------------|-------|---------|
| UA-  |               | G     | GGUG    |
|      | UAUCAAACGUC   | A     | GUUUU G |
|      | AUGGUUUUGCGGU | CAAAA | A       |
| AGA^ |               | A     | GAAA    |
|      | 50            | 40    | 30      |

NA

---

## egr-new-26

hairpin:  
GGGUCAUUCUGAUAGUUCAGAUAAACGGGUCAGAACUAUCGGAAUGGCAGU  
mature:  
CAGAACUAUCGGAAUGGCAGU

ENERGY = -26

| total reads | mature | loop | star |
|-------------|--------|------|------|
| 245         | 239    | 0    | 6    |

Bases 1 to 51

10 20

GG-| A AA

GUCAUUCUGAUAGUUC GAU A

CGGUAAGGCUAUCAAG CUG C

UGA^ A GG

50 40 30

NA

---

## egr-new-28

hairpin:  
CCUCCAUUUCGGUUCGAAUGGGCGCAUAAACUACCGCUCGAACUGGGGUUGAAGC  
mature:  
GCUCGAACUGGGGUUGAAGC

ENERGY = -20

| total reads | mature | loop | star |
|-------------|--------|------|------|
| 176         | 170    | 0    | 6    |

Bases 1 to 55

10 20

C| C U A GCGCA

CU CA UUCGGUUCGA UGG \

GA GU GGGUCAAGCU GCC U

C^ A U C AUCAA

50 40 30

NA

---

### egr-new-29

hairpin:  
UUGCACAGCUUAGAGCUCUGUCUGCUUUUCGCCUGCGGAGUGUCGGUGCUGGCGAAAGUGAU  
mature:  
UUGCACAGCUUAGAGCUCUGUC

ENERGY = -27.7

| total reads | mature | loop | star |
|-------------|--------|------|------|
| 130         | 129    | 0    | 1    |

Bases 1 to 63

```
-----          10          20
                UUA -|      CU UU
                UUGCACAGC GA GCUCUGU GC \
                AGCGUGUCG CU UGAGGCG CG U
UAGUGAA        UGG G^      UC CU
   60          50          40          30
```

NA

---

### egr-new-33

hairpin:  
GGCGACAGACGAUAAUAGACAGGUCGACAAGUAAUGACUUCAGCUUGUCUAUUAGUCAUCUGUCUCAU  
mature:  
GGCGACAGACGAUAAUAGAC

ENERGY = -26.9

| total reads | mature | loop | star |
|-------------|--------|------|------|
| 89          | 85     | 0    | 4    |

Bases 1 to 69

```
---| C          C -          C CA A
      GG GACAGA GAU AAUAGACAGGU GA AGU A
      CU CUGUCU CUG UUAUCUGUUCG CU UCA U
UUA^ -          A A          A -- G
   60          50          40
```

NA

---

### egr-new-37

hairpin:  
UGAACUCUGUCAUAAAAUUUGCUAGUCGUAGCAAUGUGUGGACGAGUUCGCGA  
mature:  
UGAACUCUGUCAUAAAAUUUGC

ENERGY = -20.3

| total reads | mature | loop | star |
|-------------|--------|------|------|
| 41          | 40     | 0    | 1    |

Bases 1 to 54

|       | 10                  | 20 |  |
|-------|---------------------|----|--|
| U---  | U AUUAA             | G  |  |
|       | GAACUC GUC AUUUGCUA | U  |  |
|       | CUUGAG CAG UAAACGAU | C  |  |
| AGCG^ | - GUGUG             | G  |  |
|       | 50 40 30            |    |  |

NA

---

### egr-new-38

hairpin:  
GAAAUGCCGAGGGCUUGGAGGACAUCGUAUCUGCAUCAAGGCUCACGGCAUUUCCU  
mature:  
GAAAUGCCGAGGGCUUGGAGG

ENERGY = -22.9

| total reads | mature | loop | star |
|-------------|--------|------|------|
| 27          | 24     | 0    | 3    |

Bases 1 to 56

|     | 10                     | 20  |  |
|-----|------------------------|-----|--|
| --  | A G GGA                | UCG |  |
|     | GAAAUGCCG GGGCUU GA CA | \   |  |
|     | CUUUACGGC CUCGGA CU GU | U   |  |
| UC^ | A A AC-                | CUA |  |
|     | 50 40 30               |     |  |

NA

---

## egr-new-41

hairpin:

AGCAGGGACUGGUUUGAAACUGCCUGCAGUACAAACUCUGCCCCUGCUGC

mature:

UACAAACUCUGCCCCUGCUGC

ENERGY = -22.2

| total reads | mature | loop | star |
|-------------|--------|------|------|
| 16          | 14     | 0    | 2    |

Bases 1 to 50

```
      10      20
--   ACU-|   AA  C
   AGCAGGG   GGUUUG ACUG C
   UCGUCCC   UCAAAC UGAC U
CG     CGUC^  A-   G
.      40      30
```

NA

---

## egr-new-42

hairpin:

GACUGGGUUGCAGGAAAAGCGUGAAUAGUGCUACAUAAGAGAACUUAGUCACGCAUACCCAAAGCCCAGUUCA

mature:

CAUACCCAAAGCCCAGUUCA

ENERGY = -30.2

| total reads | mature | loop | star |
|-------------|--------|------|------|
| 14          | 7      | 1    | 6    |

Bases 1 to 72

```
      10      20      30
--|   GCA AAA  A  G  AC
   GACUGGGUU GG  GCGUGA UAAGU CU  A
   UUGACCCGA  CC  CGCACU AUUCA GA  U
AC^     AAC  AUA  G  A  GA
   70      60      50      40
```

NA

---

### egr-new-43

hairpin:  
GUCCACGCAGCACAGCGGUCACGAAUGCUGGGCCGAUGAAUGCCACGUGGUCAC  
mature:  
GUCCACGCAGCACAGCGGUCA

ENERGY = -20.1

| total reads | mature | loop | star |
|-------------|--------|------|------|
| 21          | 19     | 0    | 2    |

Bases 1 to 54

```
          10      20
GU--  CA  --| G  A AA
      CCACG GCA CA CGGUC CG \
      GGUGC CGU GU GCCGG GU U
CACU  AC  AA^ A  - CG
      50      40      30
```

NA

---

### egr-new-45

hairpin:  
AAAGGUCAGGAUGGCGGAGUGAAGGGCGGCACUGACGCGUCAUUCCACCCUCCCCUCCUCCCCUGCCUUUUUC  
mature:  
AAAGGUCAGGAUGGCGGAGUG

ENERGY = -30.7

| total reads | mature | loop | star |
|-------------|--------|------|------|
| 8           | 7      | 0    | 1    |

Bases 1 to 74

```
          10      20      30
--|  U  AU  C  UGA  C CAC  C
      AAAGG CAGG GG GGAG AGGG GG UGA G
      UUCC GUCC CC CCUC UCCC CC ACU C
CU^  C  -- U  CCC  A CUU  G
      70      60      50      40
```

NA

---

## egr-new-46

hairpin:

UGAAUGGCUAGAGGCAUCAAGGACAUCAUCAUACGGUGCCCUUGAACCGUUUCUACCAUUCUA

mature:

UGAAUGGCUAGAGGCAUCAAG

ENERGY = -27.1

| total reads | mature | loop | star |
|-------------|--------|------|------|
| 11          | 10     | 0    | 1    |

Bases 1 to 67

```
      10      20      30
--      C      A--|  A U AUA
  UGAAUGG UAGAGGC UCAAG CA CC C
  ACUUACC AUCUUUG AGUUC GU GG A
AU      -      CCA^  C U CAU
      60      50      40
```

NA

---

## egr-new-47

hairpin:

UAGUCAGUCAGUCUGUUUGCCUGUAUGGCUGGCUGGCUGACUGGCUG

mature:

UAGUCAGUCAGUCUGUUUG

ENERGY = -28.6

| total reads | mature | loop | star |
|-------------|--------|------|------|
| 10          | 5      | 0    | 5    |

Bases 1 to 47

```
      10      20
|      U UU  UG
  UAGUCAGUCAGUC GU GCC \
  GUCGGUCAGUCGG CG CGG U
^      U GU  UA
      40      30
```

NA

---



### egr-new-48

hairpin:  
UGGUGCUUGAUCUACCACUGAUAGACAUGGAUCAGUUGUAUCAUCAAGCAUCACA  
mature:  
UGGUGCUUGAUCUACCACUGA

ENERGY = -22

| total reads | mature | loop | star |
|-------------|--------|------|------|
| 88          | 88     | 0    | 0    |

Bases 1 to 57

```
      10      20
--  -|  C  C  AGA
    UGGUGC UUGAU AUAC ACUGAU  C
    ACUACG AACUA UAUG UGACUA  A
AC   U^  C  U  GGU
     50   40   30
```

NA

---

### egr-new-50

hairpin:  
GACUUGGAUGGUUCUGCCUAACCAGGGGUGGAGGCCAUCCAAGUAGC  
mature:  
GUGGAGGCCAUCCAAGUAGC

ENERGY = -26.8

| total reads | mature | loop | star |
|-------------|--------|------|------|
| 19          | 19     | 0    | 0    |

Bases 1 to 47

```
      10      20
G--  -|  UG  AA
    ACUUGGAUGG UUC  CCU  C
    UGAACCUACC GAG  GGG  C
CGA   G^  GU  GA
     40   30
```

NA

---

## egr-new-51

hairpin:

UAGAGCUUGACGUGUUGGAGACGCGGCUACUCGUGGAUGCUCAGAGAGGAUGAAGUCACCAAUACGUUGCCAGCUCCAUC

mature:

UAGAGCUUGACGUGUUGGAGAC

ENERGY = -32.9

| total reads | mature | loop | star |
|-------------|--------|------|------|
| 136         | 136    | 0    | 0    |

Bases 1 to 81

```
          10      20      30
UA--  --      A  GCGG-| A  G  AU
      GAGCU  UGACGUGUUGG  GAC  CU CUC UGG  \
      CUCGA  GUUGCAUAACC  CUG  GG GAG ACC  G
CUAC  CC      A  AAGUA^ A  -  UC
80     70     60     50     40
```

NA

---

## egr-new-52

hairpin:

ACUAGGAGAGGGGAUGAGGAAGCCUCUCCUCUCCUGGUC

mature:

ACUAGGAGAGGGGAUGAGGA

ENERGY = -29.6

| total reads | mature | loop | star |
|-------------|--------|------|------|
| 9           | 8      | 0    | 1    |

Bases 1 to 42

```
          10      20
-|          U  A
ACUAGGAGAGGGGA  GAGG  \
UGGUCCUCUCCU  CUCC  A
C^          U  G
40     30
```

NA

---

## egr-new-55

hairpin:  
CGUGGAGGAGUUCGGGAUAGCCCUUUCGUGUGAGUGUCCGUCUCCUCCACAUC  
mature:  
CGUGGAGGAGUUCGGGAUAGC

ENERGY = -26.7

| total reads | mature | loop | star |
|-------------|--------|------|------|
| 21          | 21     | 0    | 0    |

Bases 1 to 54

```
      10      20
C--|      UU      GCC UC
      GUGGAGGAG CGGGAUA CUU G
      CACCUCCUC GCCUUGU GAG U
CUA^      U-      --- UG
      50      40      30
```

NA

---

## egr-new-56

hairpin:  
GAGUAAUUUCUAUCCGGUUGGUGUUUCCAGGGAACACUAGUGUGUCCUCUAUGUCCAAGGCAUCACCGGGUAGUUUUUACGC  
mature:  
UCACCGGGUAGUUUUUACGC

ENERGY = -34.2

| total reads | mature | loop | star |
|-------------|--------|------|------|
| 64          | 49     | 0    | 15   |

Bases 1 to 83

```
      10      20      30      40
GA  UU      U      CC----|  A  U
      GUAUU CUAUCCGG UGGUGUUU      AGGG ACAC A
      CAUUA GAUGGGCC ACUACGGAA      UCUC UGUG G
CG  UU      -      CCUGUA^  C  U
      80      70      60      50
```

NA

---

**egr-new-57**

hairpin:  
AAGAGGAGAGGGAGAAGAGAGUUAGCUGUCCAAGCUUUGCUUACCCCUUCUCCUCCUCCUUCU  
mature:  
AAGAGGAGAGGGAGAAGAGAGUU

ENERGY = -27.5

|             |               |      |             |
|-------------|---------------|------|-------------|
| total reads | <b>mature</b> | loop | <b>star</b> |
| 47          | 46            | 0    | 1           |

Bases 1 to 65

```
      10      20      30
A   A   A   -----   U-|   GU
AGAGGAG GGGAG AGA   GAGU AGCU C
UCUUCUC CCCUC UCU   UUCG UCGA C
-   -   C   UCCCCA   UU^   AA
      60      50      40
```

NA

---

**egr-new-58**

hairpin:  
AAUGGCACUGGGAUGGAUGGAGAGUGGAUCCUACCAUCCUCGUAGUGUGGUUCA  
mature:  
AAUGGCACUGGGAUGGAUGGUAG

ENERGY = -27.3

|             |               |      |             |
|-------------|---------------|------|-------------|
| total reads | <b>mature</b> | loop | <b>star</b> |
| 33          | 33            | 0    | 0           |

Bases 1 to 56

```
      10      20
--|   G   G   U   AGUG
AAU GCACUG GA GGAUGGUAG \
UUG UGUGAU CU CCUACCAUC   G
AC^ G   G   -   CUUA
      50      40      30
```

NA

---

## egr-new-59

hairpin:  
GUGAGAAUACUGGACUAGGAUGCUAUAUCCAAGUCAAGUGUUCUCACAA  
mature:  
GUGAGAAUACUGGACUAGGAUG

ENERGY = -25.2

| total reads | mature | loop | star |
|-------------|--------|------|------|
| 27          | 27     | 0    | 0    |

Bases 1 to 51

```
      10      20
--      G UA-| GC
      GUGAGAAUACU GAC GGAU U
      CACUCUUGUGA CUG CCUA A
AA      A UAA^ AU
50      40      30
```

NA

---

## egr-new-60

hairpin:  
AGCAACACCUGCGUCUCACAUAGGUUGUGGCGGUGGUGUUGAUGA  
mature:  
GUGGUGGCGGUGGUGUUGAUGA

ENERGY = -21.2

| total reads | mature | loop | star |
|-------------|--------|------|------|
| 51          | 51     | 0    | 0    |

Bases 1 to 49

```
      10      20
AG--      UG -| UA
      CAACACC CGUC UCACA A
      GUGGUGG GCGG GGUGU G
AGUA      UG U^ UG
      40      30
```

NA

---

## egr-new-61

hairpin:

UGGCGCUUGGUUUAUUCUACUGAUAGCCAAAAGUCAGUCGUAAAUCAACGUGCCGCA

mature:

UGGCGCUUGGUUUAUUCACUGA

ENERGY = -22.7

| total reads | mature | loop | star |
|-------------|--------|------|------|
| 3524        | 3524   | 0    | 0    |

Bases 1 to 57

|     | 10    | 20       |          |
|-----|-------|----------|----------|
| U-- | -     | UCU      | AGC      |
|     | GGCGC | UUGGUUU  | ACUGAU C |
|     | CCGUG | AACUAAUA | UGACUG A |
| ACG | C^    | UGC      | AAA      |
|     | 50    | 40       | 30       |

NA

---

## egr-new-62

hairpin:

GUGAUCUGCCAAUUUGCUCUCGGCCGUCGCUCUAAAAUUGGCGGGUCAAAAG

mature:

GUGAUCUGCCAAUUUGCUCUC

ENERGY = -20.6

| total reads | mature | loop | star |
|-------------|--------|------|------|
| 27          | 27     | 0    | 0    |

Bases 1 to 51

|      | 10             | 20     |       |
|------|----------------|--------|-------|
| G--  |                | GCUCUC | C     |
|      | UGAUCUGCCAAUUU |        | GGC G |
|      | ACUGGGCGGUAAA  |        | UCG U |
| GAA^ |                | AUC--- | C     |
| 50   | 40             |        | 30    |

NA

---

### egr-new-63

hairpin:  
ACGGUUCGAACAGAAGUUGGCAGAAAGCUUUUCCUCCUUCUGUUCGACCAAUU  
mature:  
CCUCCUUCUGUUCGACCAAUU

ENERGY = -22.5

| total reads | mature | loop | star |
|-------------|--------|------|------|
| 28          | 28     | 0    | 0    |

Bases 1 to 53

```
      10      20
AC--| U      UU C A
      GGU CGAACAGAAG GG AGA A
      CCA GCUUGUCUUC CC UUU G
UAAA^ -      CU U C
      50      40      30
```

NA

---

### egr-new-64

hairpin:  
GCCUGAUUUGAGUGCAGCCUCAUGUAGGCAGGACAUCGAAUCAGGAAA  
mature:  
GCAGGACAUCGAAUCAGGAAA

ENERGY = -21.9

| total reads | mature | loop | star |
|-------------|--------|------|------|
| 23          | 23     | 0    | 0    |

Bases 1 to 48

```
      10      20
G--      -| GCA CA
      CCUGAUUUGA GU GCCU \
      GGACUAAGCU CA CGGA U
AAA      A^ GGA UG
      40      30
```

NA

---

## egr-new-65

hairpin:  
UACGUGCAUUUCAGCUCAUCUUCUCCACUGCUUGGAGUCUGAGGUGAAAAUGCGCGAAUU  
mature:  
UCUGAGGUGAAAAUGCGCGAAUU

ENERGY = -26.1

| total reads | mature | loop | star |
|-------------|--------|------|------|
| 93          | 93     | 0    | 0    |

Bases 1 to 60

```
      10      20
UA--  -|  G  UCUU  CU
      CGUGCA UUUA CUCA  CUCCA \
      GCGCGU AAAGU GAGU  GAGGU G
UAAA  A^  G  CU--  UC
      50      40
```

NA

---

## egr-new-66

hairpin:  
CAUCAAAUUGGCUGUGACAUCGCAACCCGUGUCUACAGGCAAUGUUGACGACG  
mature:  
CAUCAAAUUGGCUGUGACAU

ENERGY = -21.6

| total reads | mature | loop | star |
|-------------|--------|------|------|
| 18          | 13     | 0    | 5    |

Bases 1 to 54

```
      10      20
CA---  G  -|  CGC
      UCAAUAUG CUGU GACAU  A
      AGUUGUAC GACA CUGUG  A
GCAGC  G  U^  CCC
      50      40      30
```

NA

---



## egr-new-68

hairpin:

CCAAACCGUCCAAUAGUCGACAGUUAAAACCCACCGACUACUGGAACGGUUUAAAC

mature:

CGACUACUGGAACGGUUUAAAC

ENERGY = -24.4

| total reads | mature | loop | star |
|-------------|--------|------|------|
| 7           | 6      | 0    | 1    |

Bases 1 to 56

|             | 10     | 20      |  |
|-------------|--------|---------|--|
| CC-         | A      | ACAGUUU |  |
| AAACCGUCCA  | UAGUCG | \       |  |
| UUUGGCAAGGU | AUCAGC | A       |  |
| CAA^        | C      | CACCCAA |  |
| 50          | 40     | 30      |  |

NA

---

## egr-new-70

hairpin:

CCUCCUUCUGUUCGACCAAUUCAGUCAUGCACCCUCUAACCACUGCGAUUGGUCCAAUAAAGAAGGUGGAG

mature:

CCUCCUUCUGUUCGACCAAUUC

ENERGY = -23.4

| total reads | mature | loop | star |
|-------------|--------|------|------|
| 23          | 23     | 0    | 0    |

Bases 1 to 71

|           | 10           | 20   | 30      |  |
|-----------|--------------|------|---------|--|
| -- U      | -- C         | -    | CAUGCAC |  |
| CC CCUUCU | GUU GACCAAU  | CAGU | C       |  |
| GG GGAAGA | UAA CUGGUUAG | GUCA | C       |  |
| GA U      | AA C         | C^   | CCAAUCU |  |
| 70        | 60           | 50   | 40      |  |

NA

---

### egr-new-71

hairpin:  
UUGAAGGUACUGUGAAUUUUGUAUGAGUCCAAACUGGUACAAGAUGCCCAUUCGCGGGUCCAUG  
mature:  
UUGAAGGUACUGUGAAUUUUG

ENERGY = -19.6

| total reads | mature | loop | star |
|-------------|--------|------|------|
| 12          | 12     | 0    | 0    |

Bases 1 to 65

```
      10      20      30
UUGAA U   A-----|   G   C
      GG ACUGUG      AUUUUGUAU AGU C
      CC UGGCGC      UAGAACAUG UCA A
GUA-- -   GCUUACCCG^   G   A
      60      50      40
```

NA

---

### egr-new-73

hairpin:  
UGGGCUAAAGUUGGUACAUGUACCUAGACGGUUGUGUGCAUGUCUGCUAUGGCCCAUC  
mature:  
UGGGCUAAAGUUGGUACAUGUA

ENERGY = -23.2

| total reads | mature | loop | star |
|-------------|--------|------|------|
| 67          | 67     | 0    | 0    |

Bases 1 to 58

```
      10      20
--|   A   U   U   C   A
      UGGGCUA AGU GG ACAUGUAC UAG C
      ACCCGGU UCG UC UGUACGUG GUU G
CU^   A   -   -   U   G
      50      40      30
```

NA

---

## egr-new-74

hairpin:  
GGUGCCAUUAGUGAUAGGCUCAGCGUUGAUCUAUUCACAUAGCCUUCUAGCGCUUGGAGCGU  
mature:  
GGUGCCAUUAGUGAUAGG

ENERGY = -23.7

| total reads | mature | loop | star |
|-------------|--------|------|------|
| 327         | 327    | 0    | 0    |

Bases 1 to 66

|                             | 10 | 20 | 30 |
|-----------------------------|----|----|----|
| G-  G UUA U CAGC UC         |    |    |    |
| GU CCA GUGUGA AGCCU GUUGA \ |    |    |    |
| CG GGU CGUACU UCCGA CAACU U |    |    |    |
| UG^ A UCG - CUA- UA         |    |    |    |
|                             | 60 | 50 | 40 |

NA

---

## egr-new-75

hairpin:  
AUGGAGGAGAAGGAAGGAAGAUGUUGUAAAUCUUCUCCUCAUCCUCCACAC  
mature:  
AUGGAGGAGAAGGAAGGAAGA

ENERGY = -24.1

| total reads | mature | loop | star |
|-------------|--------|------|------|
| 34          | 32     | 0    | 2    |

Bases 1 to 54

|                      | 10 | 20 |
|----------------------|----|----|
| A--  GAA AG GUU      |    |    |
| UGGAGGA GGA GAAGAU G |    |    |
| ACCUCU UCCU CUUCUA U |    |    |
| CAC^ AC- A- AAU      |    |    |
|                      | 50 | 40 |

NA

---

## egr-new-76

hairpin:

UGCCUACUCCUCAGCAAAAUUGGGAGAAAGUAAUGCGAUGUUGUCGUCGUGGCCACAUUCGCCAUUUGUUGUAGAAGGCGGAAA

mature:

AUAUUGUUGUAGAAGGCGGAAA

ENERGY = -27.1

| total reads | mature | loop | star |
|-------------|--------|------|------|
| 70          | 70     | 0    | 0    |

Bases 1 to 86

|         | 10   | 20     | 30   | 40               |
|---------|------|--------|------|------------------|
| UG-  UA | CU   | AAU    | GA   | A AA- U          |
| CC      | CUUC | CAGCAA | UGG  | GAA GU UGCGAUG U |
| GG      | GAAG | GUUGUU | ACC  | CUU CA GUGCUGC G |
| AAA^ CG | AU   | AU-    | G- A | CCG U            |
|         | 80   | 70     | 60   | 50               |

NA

---

## egr-new-78

hairpin:

AGGGCUAAAGUACAAGAGAGUGGUAACAGCUGCUGUACUUUAGCCCUCC

mature:

AGGGCUAAAGUACAAGAGAG

ENERGY = -24.4

| total reads | mature | loop | star |
|-------------|--------|------|------|
| 14          | 14     | 0    | 0    |

Bases 1 to 49

|                | 10 | 20   |
|----------------|----|------|
| --             | AG | AG G |
| AGGGCUAAAGUACA | AG | UG U |
| UCCCGAUUUCAUGU | UC | AC A |
| CC^            | CG | G- A |
|                | 40 | 30   |

NA

---

## egr-new-79

hairpin:

CCCGCACUAUGAUUGCCAAACUCCACAGCUCGCAGAGAGGAAGCAUCAAGAGUUGGCAACGGUAGUGCGAUAC

mature:

GUUGGCAACGGUAGUGCGAUAC

ENERGY = -27.2

| total reads | mature | loop | star |
|-------------|--------|------|------|
| 44          | 44     | 0    | 0    |

Bases 1 to 73

```
          10      20      30
CC--      GA   A   CACA- -| GCA
          CGCACUAU UUGCC AACUC   GC UC  G
          GCGUGAUG AACGG UUGAG   CG AG  A
CAUA      GC   -   AACUA  A^ GAG
          70      60      50      40
```

NA

---

## egr-new-80

hairpin:

CCUCUCUAUCCCUUUUCACGUUAGUAUUGUAUGCUCUACCAGUAUGCUGUGACUAUACGGAUUUUGGCGGAGUUGGGAGGCA

mature:

CCUCUCUAUCCCUUUUCACGUUA

ENERGY = -27.7

| total reads | mature | loop | star |
|-------------|--------|------|------|
| 288         | 288    | 0    | 0    |

Bases 1 to 83

```
          10      20      30
--      -- - UU-- A -   AUU-|   CU
          CCUCUCUA UCC CU   UC CGU UAGU   GUAUGCU \
          GGAGGGGU AGG GG   AG GCA AUCA   CGUAUGA  A
AC      UG  C UUUU -  U   GUGU^   CC
          80      70      60      50      40
```

NA

---

## egr-new-82

hairpin:  
ACCACAAAAACUGCCGAAAAACGAUAAAGUAAAAUCCUUUUUGGUAGUUUUUGUAGGAUU  
mature:  
UUUGGUAGUUUUUGUAGGAUU

ENERGY = -23.6

| total reads | mature | loop | star |
|-------------|--------|------|------|
| 67          | 67     | 0    | 0    |

Bases 1 to 61

10 20  
A-- - C-| AAG  
CC AAAAAACUGCCGAAAA GAU \  
GG UGUUUUUUGAUGGUUUU CUA U  
UUA A UC^ AAA  
60 50 40 30

NA

---

## egr-new-87

hairpin:  
AUUUGCUCUGGGUUAGUAGAAGGCAUUUAAAUGCACUACUAAACCAAGAGACAAAUUGA  
mature:  
AUUUGCUCUGGGUUAGUAGAA

ENERGY = -21

| total reads | mature | loop | star |
|-------------|--------|------|------|
| 5555        | 3992   | 10   | 1553 |

Bases 1 to 60

10 20  
--- - G -| AAG U  
AUUG CUCU GG UUAGUAG GCAUU \  
UAAAC GAGA CC AAUCAUC CGUAA U  
AGU A A A^ A-- A  
. 50 40 30

NA

---

## egr-new-91

hairpin:

CUGAUUCGAAACCUCGGCCUUUUUGUUACUGUUCUUUGGGUUUCCCUAACAUAGACUCCACUGCGUAAUUAGAGGAUUGUUUCGGGUGGGC

mature:

CUGAUUCGAAACCUCGGCC

ENERGY = -26.2

| total reads | mature | loop | star |
|-------------|--------|------|------|
| 56          | 56     | 0    | 0    |

Bases 1 to 91

```
      10      20      30      40
-| G      CUCGG  UU   U  UCUU  UU  CCU
CU AUUCGAAAC  CCUUU  GUUAC  GU   UGGG  UC  A
GG UGGGCUUUG  GGAGA  UAAUG  CG   ACCC  AG  A
C^ G      UUA--  U-   -  UC--  UC  UAC
90      80      70      60      50
```

NA

---

## egr-new-92

hairpin:

UGUGGGCAAAGUGAGUGGGAUCAAACAUAUGUCAACAUAUGAAACAUAUGGGAAAUCUCAUGCCUUUGCCCACGAA

mature:

UGUGGGCAAAGUGAGUGGGAUC

ENERGY = -28.3

| total reads | mature | loop | star |
|-------------|--------|------|------|
| 28          | 28     | 0    | 0    |

Bases 1 to 76

```
      10      20      30
--|      UGA      CAAA  UUAUG  AC
UGUGGGCAAAG  GUGGGAU  CA   UCA  \
GCACCCGUUUC  UACUCUA  GU   AGU  A
AA^      CG-   AAGG  UACAA  AU
      70      60      50      40
```

NA

---

## egr-new-95

hairpin:

CCUCCUUCUGCUUUUUUACCUCGGUGCUGUCCAGCUAACUUGUAGGAAAAGUGAAGGAGGCA

mature:

CCUCCUUCUGCUUUUUUC

ENERGY = -20.9

| total reads | mature | loop | star |
|-------------|--------|------|------|
| 18          | 18     | 0    | 0    |

Bases 1 to 64

```
      10      20      30
--|   CU   U CCUC  -- G
  CCUCCUUC  GCUUUUUU CA  GGU  GCU U
  GGAGGAAG  UGAAAGGA GU   UCA  CGA C
AC^  --      U  ----  AU  C
    60      50      40
```

NA

---

## egr-new-96

hairpin:

AUGCGGAUGGUUAAAGGAAUGGGGAGAAUGACCUUGACAGGAGAGUCCUGAGGUGCCAGUCCCCAGAUCAAACCACCGCAGAC

mature:

AUGCGGAUGGUUAAAGGAAUGGG

ENERGY = -34.3

| total reads | mature | loop | star |
|-------------|--------|------|------|
| 10          | 10     | 0    | 0    |

Bases 1 to 83

```
      10      20      30      40
A--|  A  AA AA  GAAUG  UGA  AG
  UGCGG UGGUU  GG  UGGGA  ACCU  CAGG  A
  ACGCC ACCAA  CU  ACCCU  UGGA  GUCC  G
CAG^  -  A-  AG  GACCG  ---  CU
    80      70      60      50
```

NA

---



## egr-new-97

hairpin:

GGAGGGUAUUAACCGAAGGCACAGAUUUGCCUUCGGCCCCACCCUCCU

mature:

GGAGGGUAUUAACCGAAGGC

ENERGY = -25.6

| total reads | mature | loop | star |
|-------------|--------|------|------|
| 10          | 10     | 0    | 0    |

Bases 1 to 49

```
      10      20
--|  AUUAA      CA
  GGAGGGU  CCGAAGGCA G
  CUUCCCA  GGCUCCGU A
UC^  CCCC-      UU
      40      30
```

NA

---

## egr-new-98

hairpin:

GAGAUGAGCAUCCAGUGCUUAGUGAUUGUGUAAGCACUGCUGCUCAUACCACAAUCAUCAUC

mature:

GAGAUGAGCAUCCAGUGCUUA

ENERGY = -21.4

| total reads | mature | loop | star |
|-------------|--------|------|------|
| 11          | 10     | 0    | 1    |

Bases 1 to 63

```
      10      20
GAG-----|  UC      GUGA
      AUGAGCA  CAGUGCUUA  \
      UACUCGU  GUCACGAAU  U
CUACUUACUAAACCCA^  C-      GUGU
  60      50      40      30
```

NA

---

## egr-new-99

hairpin:

UGCAUUUCAUCACCUACUCCCAUCACUUACCGUGGUGGACACUUUCGGUGUGAUGGAUUGAAUAAGAGUGCACA

mature:

AUGGAUUGAAUAAGAGUGCACA

ENERGY = -27.4

| total reads | mature | loop | star |
|-------------|--------|------|------|
| 8           | 8      | 0    | 0    |

Bases 1 to 76

```
      10      20      30
--   CA--| CCUACUC      UU  U-  G
   UGCAUUU  UCA      CCAUCAC  ACCG  GGUG  U
   ACGUGAG  AGU      GGUAGUG  UGGC  UCAC  G
AC   AAUA^ UA-----  --  UU  A
      70      60      50      40
```

NA

---

## egr-new-100

hairpin:

GUAGAUCGUUUGGCGAUUAGCGGUGAACAGUGAUUUACAGUGAAGGCCAAACAUCUACCA

mature:

GUAGAUCGUUUGGCGAUUAGCG

ENERGY = -20.7

| total reads | mature | loop | star |
|-------------|--------|------|------|
| 40          | 40     | 0    | 0    |

Bases 1 to 60

```
      10      20      30
--|   C      GAUAA  G  CA
   GUAGAU GUUUGGC  GC  GUGAA  G
   CAUCUA CAAACCG  UG  CAUU  U
AC^  -      GAAG-  A  AG
.      50      40
```

NA

---

## egr-new-104

hairpin:

CGUGGGGCUUGUGGUACUUCUGGGUGCGGGUGCAGUGCGUGUGUUGGCGCAGGGGUAAGCCAGUCCUAAUUC

mature:

CGUGGGGCUUGUGGUACUUCUG

ENERGY = -28.8

| total reads | mature | loop | star |
|-------------|--------|------|------|
| 7           | 7      | 0    | 0    |

Bases 1 to 73

```
          10      20      30
CGU---|   U GG      GG  G UG GU
          GGGGCU GU UACUUCU GUGC GG CA \
          CCCUGA CG AUGGGGA CGCG UU GU G
CUUUUAU^  C A-      --  G GU GC
          70      60      50      40
```

NA

---

## egr-new-106

hairpin:

GAGCGGCUGUUGAACUAGUACCGACCUUUGAUAAUUACCCAACAGACAGUUCGUGUAUCAAGUUCAAAUAAGCCGCAUUUG

mature:

GAGCGGCUGUUGAACUAGUACC

ENERGY = -26

| total reads | mature | loop | star |
|-------------|--------|------|------|
| 8           | 8      | 0    | 0    |

Bases 1 to 81

```
          10      20      30
GA---   -   --   -  C --| AUAAU
          GCGGCUG UUGAACU AGUAC CGA CU UUG  U
          CGCCGAU AACUUGA UUAUG GCU GA GAC  A
GUUUA   A   AC   U  U  CA^ AACCC
          80      70      60      50      40
```

NA

---

## egr-new-107

hairpin:  
AGAAGUUGUUAGCUGGUAGGUAUGAUUAGCUACCAUCUCUCAGCUUCAU  
mature:  
AGAAGUUGUUAGCUGGUAGG

ENERGY = -21.5

| total reads | mature | loop | star |
|-------------|--------|------|------|
| 17          | 17     | 0    | 0    |

Bases 1 to 50

10 20  
A--| UU C G U  
GAAGUUG AG UGGUAG UA G  
CUUCGAC UC ACCAUC AU A  
UUA^ UC U G U  
. 40 30

NA

---

## egr-new-108

hairpin:  
AACUAAAUGGUCGUGUGGCUGCAUUACGCCGACUGCCAUUUGAUGUCAC  
mature:  
AACUAAAUGGUCGUGUGGC

ENERGY = -23.1

| total reads | mature | loop | star |
|-------------|--------|------|------|
| 10          | 10     | 0    | 0    |

Bases 1 to 51

10 20  
A-- -| C UGC  
AC UAAAUGGU GUGUGGC A  
UG AGUUUACCG CACGCCG U  
CAC U^ U CAU  
50 40 30

NA

---

### egr-new-109

hairpin:

CGGACAGUGCACGGGUAUUUUGCUUUGCCUGUGCACGCGCCGGGGCAGGGCAGGGCGGGUGCCCAUUGGACGAC

mature:

CGGACAGUGCACGGGUAUUUU

ENERGY = -42.3

| total reads | mature | loop | star |
|-------------|--------|------|------|
| 6           | 6      | 0    | 0    |

Bases 1 to 83

```
      10      20      30      40
--| GA  CAC  -      G  G  A  C
   CG CAGUG GGGUAUU UUGCUUUGCCU UGC UC CG \
   GC GUUAC CCCGUGG GCGGGACGGG ACG GG GC G
CA^ AG  A--  C      G  G  -  C
   80      70      60      50
```

NA

---

### egr-new-113

hairpin:

CGGUGUGGGAGUAGAUUUCUGAGAACAUUUUAGUGACCUUAGAGGAUUGCUCAGCACUGUU

mature:

CGGUGUGGGAGUAGAUUUCUG

ENERGY = -22.4

| total reads | mature | loop | star |
|-------------|--------|------|------|
| 7           | 7      | 0    | 0    |

Bases 1 to 62

```
      10      20      30
--|  GG  GA-  AA  U
   CGGUGU GAGUA UUUCUGAG CAU U
   GUCACG CUCGU GGAGAUUC GUG U
UU^  A-  AUA  CA  A
   60      50      40
```

NA

---

## egr-new-114

hairpin:

GUGCACACGUAUGUGUAUGCAUCUAUGCGGGCCUACACACACGUGCGCACGA

mature:

GUGCACACGUAUGUGUAUG

ENERGY = -24.5

| total reads | mature | loop | star |
|-------------|--------|------|------|
| 6           | 6      | 0    | 0    |

Bases 1 to 54

```
      10      20
--|  A   A   U A UAU
    GUGC CACGU UGUGUA GC UC \
    CACG GUGCA ACACAU CG GG  G
AG^  C   C   C - CGC
     50     40     30
```

NA

---

## egr-new-115

hairpin:

ACUGAGGGCGGUAGUGUUUUUUCGUUGACCAUCAAAUGAAAUGGAUGGGUUGGAAUGAGAGACACUCACCGCUUUUAGAGC

mature:

ACUGAGGGCGGUAGUGUUU

ENERGY = -30.9

| total reads | mature | loop | star |
|-------------|--------|------|------|
| 6           | 6      | 0    | 0    |

Bases 1 to 85

```
      10      20      30
A-- - - - -- G UG ---| G
    CU GAGGGCGGU AGUGUUUUU UC U ACCAU CAAU \
    GA UUUUCGCCA UCACAGAGAG AG G UGGUG GUUA A
CGA U   C   UA - GU   UAG^  A
     80     70     60     50     40
```

NA

---

## egr-new-118

hairpin:

ACGUUCGCGCACGUCCAGCGGAGAUCCUGCCAUCACGGUGUUAGGACUCUUCUGACAUGCAUGAACGAGU

mature:

UCUGACAUGCAUGAACGAGU

ENERGY = -30.4

| total reads | mature | loop | star |
|-------------|--------|------|------|
| 62          | 62     | 0    | 0    |

Bases 1 to 70

```
          10      20      30
A--|   C  C  C  C  A  C  C
      CGUUCG GCA GUC AG GGAG UCCUG CAU A
      GCAAGU CGU CAG UC UCUC AGGAU GUG C
UGA^   A  A  -  U  -  U  G
      60      50      40
```

NA

---

## egr-new-119

hairpin:

GGGAGGGAGUGAGGGAGGUAGAUAGUGUCCACUGCCUUCACAUCCUCCGUA

mature:

CCACUGCCUUCACAUCCUCCGUA

ENERGY = -24.3

| total reads | mature | loop | star |
|-------------|--------|------|------|
| 5           | 5      | 0    | 0    |

Bases 1 to 52

```
          10      20
G--   GA      A  A-|  A
      GGAGG  GUGAGGG GGU  GAU \
      CCUCC  CACUUCU UCA  CUG G
AUG   UA      G  CC^  U
      50      40      30
```

NA

---

## egr-new-120

hairpin:

UUUCAUCACCCUACCAGAUUGCUCUUUUUAGUUGGAGCUUAGCAUCAGCUUUGGAGGUACCCUCAUGGGUGUGAAUUA

mature:

UUUCAUCACCCUACCAGAUUGCUCU

ENERGY = -24.2

|             |               |      |      |
|-------------|---------------|------|------|
| total reads | <b>mature</b> | loop | star |
| 6           | 6             | 0    | 0    |

Bases 1 to 83

|      |      |       |    |       |     |       |    |   |
|------|------|-------|----|-------|-----|-------|----|---|
|      | 10   | 20    | 30 | 40    |     |       |    |   |
| U--  | U    | UACC  | AU | CUUAU | UU  | GA    | U  |   |
|      | UUA  | CACCC | AG | UGCU  | UCU | AGUUG | GC | U |
|      | AAGU | GUGGG | UC | AUGG  | AGG | UCGAC | CG | A |
| AUU^ | -    | UAC-  | CC | ----- | UU  | UA    | A  |   |
| 80   | 70   |       | 60 |       | 50  |       |    |   |

NA

---

## egr-new-122

hairpin:

GGUGGUGGUGGUGGUGGCGGUGAAGAUGACGUGUGUUUCUGAGUCUGCUUUUAUCAUCACCAUCGUGA

mature:

CUGCUUUUAUCAUCACCAUCGUGA

ENERGY = -28.5

|             |               |      |             |
|-------------|---------------|------|-------------|
| total reads | <b>mature</b> | loop | <b>star</b> |
| 401         | 370           | 3    | 28          |

Bases 1 to 67

|      |              |       |       |     |   |
|------|--------------|-------|-------|-----|---|
|      | 10           | 20    | 30    |     |   |
| - GU |              | --    | UGA-  | U   | G |
| G    | GGUGGUGGUGGU | GGCGG | AGA   | GAC | U |
| C    | CUACCACUACUA | UCGUC | UCU   | UUG | G |
| A    | UG           | UU    | UGAG^ | -   | U |
| 60   | 50           |       | 40    |     |   |

NA

---



### egr-new-123

hairpin:  
GGGGAGCGACGCUAGGGAAUAAGUAAUUAGGCUUGUCCCUUUAUUCGUCUCCUGU  
mature:  
GUCCCUUUAUUCGUCUCCUGU

ENERGY = -26.7

| total reads | mature | loop | star |
|-------------|--------|------|------|
| 5           | 5      | 0    | 0    |

Bases 1 to 57

```
      10      20
--|      CGCU  A  AA
  GGGGAGCGCA  AGGGA UAAGU U
  UCCUUCUGCU  UCCCU GUUCG U
UG~      UAUU  -  GA
      50      40      30
```

NA

---

### egr-new-124

hairpin:  
AACCGGUUGGUGGGAGGCAUGGUC AUGCCCCACUUUCCCGCCUUU  
mature:  
AACCGGUUGGUGGGAGGCAUG

ENERGY = -27.6

| total reads | mature | loop | star |
|-------------|--------|------|------|
| 5           | 5      | 0    | 0    |

Bases 1 to 48

```
      10      20
AAC--|  UU  A  G
      CGGG  GGUGGG GGCAU G
      GCCC  UCACCC CCGUA U
UUUCC~  UU  C  C
      40      30
```

NA

---

## egr-new-125

hairpin:  
CGUCUGCAUGUCUUUGGGGCCUACAAGGGUGUCUGCGGGCGGAUGGC  
mature:  
GGGUGUCUGCGGGCGGAUGGC

ENERGY = -20.9

| total reads | mature | loop | star |
|-------------|--------|------|------|
| 1854        | 1854   | 0    | 0    |

Bases 1 to 49

```
      10      20
--|   A  CUUU G  A
   CGUCUGC UGU  GG GCCCU C
   GUAGGCG GCG  CU UGGGA A
CG^   G  U--- G  A
      40      30
```

NA

---

## egr-new-126

hairpin:  
CCUCGUCUCGUCUCGUCUCGCCUCGGAAGAGAGAGAGGGAAGGGAGAGGCG  
mature:  
CCUCGUCUCGUCUCGUCUC

ENERGY = -26.7

| total reads | mature | loop | star |
|-------------|--------|------|------|
| 229         | 229    | 0    | 0    |

Bases 1 to 52

```
      10      20
--|   G  G  GU  GC  G
   CCUC UCUC UCUC  CUC  CUC G
   GGAG AGGG AGGG  GAG  GAG A
GC^  -  A  AG  A-  A
      50      40      30
```

NA

---

## egr-new-127

hairpin:

CGGAGGGGUCUGGGAGCUUCUGGCAUGGCCAAGGGUCAUAAUGCUGGGCAAGAAGUACAAUGACCGUGUCCUUAAU

mature:

CGGAGGGGUCUGGGAGCUUCUG

ENERGY = -27.6

| total reads | mature | loop | star |
|-------------|--------|------|------|
| 5           | 5      | 0    | 0    |

Bases 1 to 78

```
          10      20          30
C----- GG-  UGGGA  -----  ---|  C
          GGA  GGUC  GCUUCU  GGCA  UGCC A
          CCU  CCAG  UGAAGA  UCGU  ACUGG A
UAAUUU  GUG  UAACA  ACGGG  AAU^  G
          70      60      50      40
```

NA

---

## egr-new-128

hairpin:

AAAUGGACCACAAAGAACGCGCUAAUAGACAGCGGUCCUUUGUGGUCCAUUUGU

mature:

AAAUGGACCACAAAGAACGC

ENERGY = -35.8

| total reads | mature | loop | star |
|-------------|--------|------|------|
| 31          | 31     | 0    | 0    |

Bases 1 to 55

```
          10      20
--|          A      AAU
AAAUGGACCACAAAG ACGCGCU \
UUUACCUGGUGUUUC UGCGCGA  A
UG^          C      CAG
          50      40      30
```

NA

---

## egr-new-130

hairpin:

CAUCCUAAUCCAUGCUUGUUUCAGACUCUGCCGUCGAUUUGGACGCAUUGUCUGGGACGAGGAUAGCGAUGGGAUUUC

mature:

CAUCCUAAUCCAUGCUUGUUUCA

ENERGY = -33.5

| total reads | mature | loop | star |
|-------------|--------|------|------|
| 5           | 5      | 0    | 0    |

Bases 1 to 81

|      |         |           |       |           |
|------|---------|-----------|-------|-----------|
|      | 10      | 20        | 30    | 40        |
| C--  | AUCC G  | UU        | UC C  | GA        |
|      | AUCCUA  | AU CUUGUU | CAGAC | UGC GUC U |
|      | UAGGGU  | UA GAGCAG | GUCUG | ACG CAG U |
| CUA^ | AGCGA G | GG        | UU -  | GU        |
| 80   | 70      | 60        | 50    |           |

NA

---

## egr-new-131

hairpin:

AAGAAGACCAUAGACACGCACUGCCACAGGCGUACCACAUUUCGGUGCGAUAGACAGGUGGCGGUAUGCGUUUCAAGUGC

mature:

AAGAAGACCAUAGACACGCACU

ENERGY = -28.7

| total reads | mature | loop | star |
|-------------|--------|------|------|
| 9           | 9      | 0    | 0    |

Bases 1 to 83

|        |            |          |         |          |
|--------|------------|----------|---------|----------|
|        | 10         | 20       | 30      |          |
| AA---- | -  AG A    | U        | ACAGG-- | ACA      |
|        | GAAGAC CAU | AC CGCAC | GCC     | CGUACC \ |
|        | CUUUUG GUA | UG GCGUG | UGG     | GCGUGG U |
| CGUGAA | C^ -- C    | -        | ACAGUA  | CUU      |
| 80     | 70         | 60       | 50      |          |

NA

---

## egr-new-132

hairpin:

UGGUGUGGAGCUGUAGAAUUGGCCGGGAACUCCUGCUAUCAGCAGUAUUUGUCCUCUGUGAAAUGUCGCCCCACAGCAUC

mature:

UGGUGUGGAGCUGUAGAAUUG

ENERGY = -28.1

| total reads | mature | loop | star |
|-------------|--------|------|------|
| 5           | 5      | 0    | 0    |

Bases 1 to 84

```
      10      20      30
--  G   A  UGUAGAA-  CC   UC---|  UA
   UG  UGUGG  GC      UAUG  GGAAC   CUGC  \
   AC ACACC  CG      GUGUC  CCCUUG   GACG  U
CU  G   C  UCUGUAUU  U-   UUUAU^  AC
   80     70     60     50
```

NA

---

## egr-new-134

hairpin:

GCGUAGGUGCGCGGGGCGAUUUCGCUUGGACAUACUGUACAGUUAAGUGAAUUAUCUCCCUUCCGCAUUUAGCCC

mature:

UCCCUUCCGCAUUUAGCCC

ENERGY = -26.4

| total reads | mature | loop | star |
|-------------|--------|------|------|
| 47          | 47     | 0    | 0    |

Bases 1 to 75

```
      10      20      30
--  G   C-  C  --|  GACAU  G
   GC  UAGGUGCG  GGGG  GAUA  UCGCUUG   ACU  U
   CG  AUUUACGC  UCCC  CUAU  AGUGAAU   UGA  A
CC  -   CU  U  UA^  -----  C
   70     60     50     40
```

NA

---

### egr-new-141

hairpin:

AGGUACUAGGGCUACUGGCAUGGCCUGAAGGCCUAGCCACCCGGUGUGGUACAAUGGCCGAGCCAAAAGGGUUCUUUACCUAA

mature:

AGGUACUAGGGCUACUGGCAUG

ENERGY = -36.2

| total reads | mature | loop | star |
|-------------|--------|------|------|
| 20          | 20     | 0    | 0    |

Bases 1 to 84

```
      10      20      30      40
--  CU      ---|  A  UGAAG  GC  A
  AGGUA  AGGGCUAC  UGGC  UGGCC  GCUA  CC  C
  UCCAU  UCUUGGUG  ACCG  GCCGG  UGGU  GG  C
AA  U-      AAA^  A  UAACA  GU  C
  80      70      60      50
```

NA

---

### egr-new-143

hairpin:

AGGACACAGAAGGUGGAACGGAGGCAUCGCUAAUCGAGUAGUGACUUUUCUCCUUUCACUUCGUGUGUGUAUG

mature:

AGGACACAGAAGGUGGAACGGAGGC

ENERGY = -27

| total reads | mature | loop | star |
|-------------|--------|------|------|
| 18          | 18     | 0    | 0    |

Bases 1 to 74

```
      10      20      30
AGG--  GA      C  CA--|  AU
  ACACA  AGGUGGAA  GGAGG  UCGCUA  C
  UGUGU  UUCACUU  CCUCU  AGUGAU  G
GUAUG  GC      U  UUUC^  GA
  70      60      50      40
```

NA

---

**egr-new-145**

hairpin:

AGAAUGCCCGCAAUAAUUUCUGGCGCCGUAUGUCCUAGCUCGCCGUAAGGUUGUUAGCCAGCUGUUGCGGUCAUGUUG

mature:

AGAAUGCCCGCAAUAAUUUCUG

ENERGY = -29.8

| total reads | mature | loop | star |
|-------------|--------|------|------|
| 5           | 5      | 0    | 0    |

Bases 1 to 76

|              | 10    | 20        | 30 |  |
|--------------|-------|-----------|----|--|
| AGA-  C      | UUU   | GCCGUAUG  | U  |  |
| AUG CCGCAAUA | CUGGC | UCCUAGC \ |    |  |
| UAC GCGUUGU  | GACCG | GGGAUCG C |    |  |
| GUUG^ U      | C--   | AUUGUU--  | C  |  |
| 70           | 60    | 50        |    |  |

NA

---
