# Supplementary material for: Genome-wide sequencing of small RNAs reveals a tissue-specific loss of conserved microRNA families in Echinococcus granulosus
Source: PubMed Central journal article supplement (PMC4156656; doi:10.1186/1471-2164-15-736), 2014-08-29
Supplement: 12864_2014_6407_MOESM4_ESM.pdf [file 12864_2014_6407_MOESM4_ESM.pdf]

|                   |            |            |            |            |             |            |     |  |   |
|-------------------|------------|------------|------------|------------|-------------|------------|-----|--|---|
|                   | *** ****   |            | ** * **    |            | * ***       |            | *   |  | * |
| <b>egr-new-12</b> | UGGCGCUUGA | UUUCAACACU | GUUAGAAG-- | -----CAAC  | AGUGUUGAUA  | CCAGGCAUUC | ACC |  |   |
| <b>egr-new-24</b> | UGGCGCUUGA | CCAUGCUACU | GAUAGACG-- | ----CAAUC  | AGUUGUAUCA  | UCAAUGCGCC | GCA |  |   |
| <b>egr-new-7</b>  | UGGCGCUUUC | UAACUUUACU | GAUAGUGA-- | ----UUUAUC | AGUAAAAGUCA | UAAAUGCACC | UCA |  |   |
| <b>egr-new-61</b> | UGGCGCUUGG | UUAUUCUACU | GAUAGCCA-- | ----AAAGUC | AGUCGUAUAA  | UCAACGUGCC | GCA |  |   |
| <b>egr-new-15</b> | UGGAGCUUGG | UGACAAGACU | GACAGACA-- | ----AGUGGC | AGUGUUGCUA  | UCAAUGCUC  | GCA |  |   |
| <b>egr-new-22</b> | UGGCGCUUGA | UUUCAACGCU | GAUAGAAAAC | ACCGUACAUC | AGUGUUGAUG  | UCAGGUUGCU | UCU |  |   |

|                   |            |            |            |            |             |            |     |  |  |
|-------------------|------------|------------|------------|------------|-------------|------------|-----|--|--|
|                   | *** ****   |            | ** * **    |            | ***         |            | *   |  |  |
| <b>emu-new-24</b> | UGGCGCUUGA | CCAUGCUACU | GAUAGACG-- | ----CAAUC  | AGUUGUAUCA  | UCAAUGCGCC | GCA |  |  |
| <b>emu-new-61</b> | UGGCGCUUGG | UUAUUCUACU | GAUAGCCA-- | ----AAAGUG | AGUCGUAUAA  | UCAACGCGCC | GCA |  |  |
| <b>emu-new-7</b>  | UGGCGCUUUC | UAACUUUACU | GAUAGUGA-- | ----UUUAUC | AGUAAAAGUCA | UAAAUGCACC | UCA |  |  |
| <b>emu-new-15</b> | UGGAGCUUGG | UGACAAGACU | GACAGACA-- | ----AGUGGC | AGUGUUGCUA  | UCAAUGCUC  | GUA |  |  |
| <b>emu-new-12</b> | UGGCGCUUGA | UUUCAACACU | GUUAGAAG-- | -----CAAC  | AGUGUUGAUA  | CCAGGCAUUC | ACC |  |  |
| <b>emu-new-22</b> | UGGCGCUUGA | UUUCAACGCU | GAUAGAAAAC | ACCGUACAUC | AGUGUUGAUG  | UCAGGUUGCU | UCU |  |  |
