# Supplementary material for: Genome-wide sequencing of small RNAs reveals a tissue-specific loss of conserved microRNA families in Echinococcus granulosus
Source: PubMed Central journal article supplement (PMC4156656; doi:10.1186/1471-2164-15-736), 2014-08-29
Supplement: 12864_2014_6407_MOESM5_ESM.pdf [file 12864_2014_6407_MOESM5_ESM.pdf]

Adult Cyst PSC

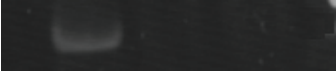

egr-new-15

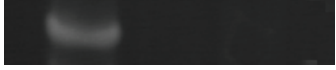

egr-new-22

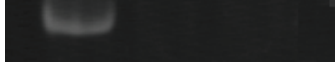

egr-new-61

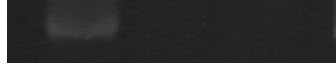

egr-new-12

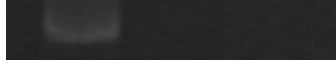

egr-new-7

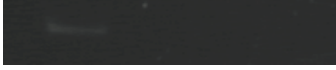

egr-new-24

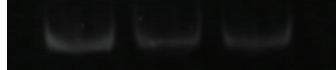

5.8s rRNA
