# Supplementary material for: Genome-wide sequencing of small RNAs reveals a tissue-specific loss of conserved microRNA families in Echinococcus granulosus
Source: PubMed Central journal article supplement (PMC4156656; doi:10.1186/1471-2164-15-736), 2014-08-29
Supplement: 12864_2014_6407_MOESM6_ESM.pdf [file 12864_2014_6407_MOESM6_ESM.pdf]

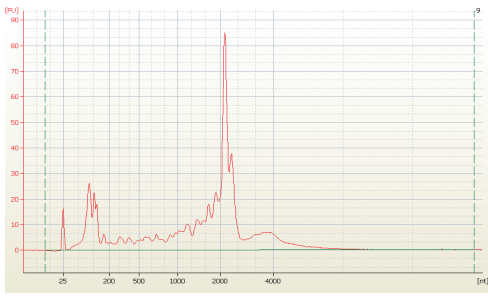

PSC (RIN 7.0)

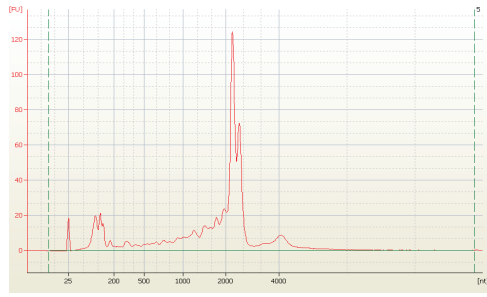

Adult worm (RIN 6.5)

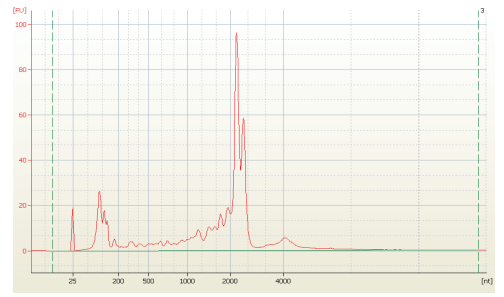

Cyst (RIN 6.8)
